# Supplementary material
Source: bioRxiv or medRxiv preprint supplement (https://www.medrxiv.org/highwire/filestream/94191/field_highwire_adjunct_files/0/2020.08.23.20180141-1.pdf)
Supplement: Supplementary file [file 2020.08.23.20180141-1.pdf]

## Appendix

### **Knowledge and Risk Perception of the Novel Coronavirus Pandemic Among Adult Population in Nigeria: A cross-sectional study**

#### **Section A: Demographics**

Instructions: Please select the box next to the answer of your choice.

1. Gender

- Male
- Female

2. Age

- 18 – 25
- 26 – 35
- 36 – 45
- 46 – 55
- 55+

3. Education

- Less than senior school certificate
- senior school certificate
- Diploma
- Bachelor's degree
- Master's degree

- Professional degree
- Doctorate

4. Region of Residence.

- South East
- North Central
- South South
- North West
- South West
- North East

5. Monthly Income (Naira).

- $\leq 30,000$
- 30,000 – 59,000
- 60,000 – 89,000
- 90,000 – 109,000
- $\geq 110,000$

6. Are you a healthcare worker, such as a nurse, physician, community health-worker or pharmacist?

- No, I'm not a healthcare provider
- Nurse
- Physician
- Community health worker
- Pharmacist
- Med. Laboratory Scientist
- Other healthcare worker

## **Section B: Knowledge of Novel Coronavirus (COVID-19)**

Instructions: The following are questions that will ask about your knowledge level on novel coronavirus.

Please select the answer (s) of your choice.

1. Are you aware of the novel coronavirus outbreak?

- Yes
- No

2. How did you learn about the coronavirus outbreak?

- Media (TV/Radio/Bill boards/Newspapers)
- Social Media
- Health Officials

3. Which of the following is correct about the definition of novel coronavirus?

- Novel coronavirus is a respiratory disease caused by a viral infection.
- Displayed symptoms usually include respiratory symptoms accompanied by fever, but novel coronavirus is not contagious.
- Novel coronavirus can progress to a severe illness but never leads to death.
- Don't know

4. Which of the following is correct about transmission route of novel coronavirus?

- Novel coronavirus is transmitted through coughing or sneezing.
- Novel coronavirus is not transmitted by close contact with people.
- Don't know.

5. Which of the following is correct about “close contact” of novel coronavirus?
- “Close contact” involves a direct contact with persons’ respiratory secretions.
  - Relatives and healthcare workers are excluded from the category of close contact.
  - Don’t know.
6. All of the following are correct about “physical distancing”? Select all that apply
- Staying at least 6 feet (about 2 arms’ length) from other people
  - Stay out of crowded places and avoid mass gatherings
  - Avoiding common greetings, such as handshakes
  - limiting contact with people at higher risk (e.g. older adults and those in poor health)
7. Which one is correct about the treatment or vaccine for the novel coronavirus?
- There is a curative treatment for novel coronavirus
  - Currently, there is neither a curative treatment nor a vaccine
  - Currently, there isn’t a curative treatment, but there is a vaccine
  - Don’t know.
8. What age groups are most likely to die from the illness caused by the new corona virus?
- Children
  - Young adults
  - Older adults
9. Are those with other health problems more likely to die from an infection with the new coronavirus disease than those without any other health problems?

- Yes
- No
- Don't know

**10.** Only older adults can become infected with the new coronavirus.

- Yes
- No
- Don't know

**11.** Can someone develop immunity for coronavirus after recovering from COVID-19?

- Yes
- No
- Don't know

**12.** What is the main way in which people are currently getting infected with the new coronavirus?

- Eating or touching bats
- Unhygienic preparation of food
- Sexual intercourse or sharing of needles for drug use
- Mosquito bites
- When Droplets of saliva or mucus are inhaled from an infected person who sneezes or coughs
- Directly coming into touch with someone's bodily fluids like blood, vomit, or sweat

**13.** What are the common signs and symptoms of an infection with the new coronavirus? Select all that apply.

- Nose bleeds
- Dry cough
- Skin rash
- Constipation
- Fever
- Shortness of breath
- Diarrhoea
- Frequent urination

**14.** If you have a fever or cough and recently came in contact with someone who is

- confirmed to be positive for the new coronavirus, what action will you take?
- Call the National Centre for Disease Control (NCDC)
- Self-isolate for two weeks
- Quarantine
- Rest more than usual and then call your primary care doctor if you still feel sick after 2-3 days.
- Have someone drive you to the emergency room

### Section C: Risk Perception on Novel Coronavirus

1. Instructions: Please select the answer depending on how much you agree with the statements below.

| Risk perception statements                                                                                                       | Strongly Disagree | Disagree | Neutral | Agree | Strongly Agree |
|----------------------------------------------------------------------------------------------------------------------------------|-------------------|----------|---------|-------|----------------|
| My health will be severely damaged if I contract novel coronavirus.                                                              | 1                 | 2        | 3       | 4     | 5              |
| I think novel COVID-19 is more severe than Ebola virus disease.                                                                  | 1                 | 2        | 3       | 4     | 5              |
| Even if I fall ill with another disease, I will not go to hospital because of risk of getting novel coronavirus in the hospital. | 1                 | 2        | 3       | 4     | 5              |
| Novel coronavirus will inflict serious damage in my community.                                                                   | 1                 | 2        | 3       | 4     | 5              |
| Novel coronavirus will spread widely in Nigeria.                                                                                 | 1                 | 2        | 3       | 4     | 5              |
| I am more likely to get the novel coronavirus than other people.                                                                 | 1                 | 2        | 3       | 4     | 5              |
| I believe I can protect myself against the novel coronavirus.                                                                    | 1                 | 2        | 3       | 4     | 5              |
| Receiving a letter or package from Abroad can put me at risk of getting infected with the new coronavirus?                       | 1                 | 2        | 3       | 4     | 5              |

**Section D: Preventive measures**

What are some of the measures you have taken to prevent infection from the novel coronavirus? Select all that apply

| Preventive measures taken                                                       | Yes | No |
|---------------------------------------------------------------------------------|-----|----|
| Avoided travel novel coronavirus infected areas.                                | Yes | No |
| Washed hands with soap and water.                                               | Yes | No |
| Disinfected surfaces.                                                           | Yes | No |
| Avoided touching your eyes, nose, and mouth with unwashed hands.                | Yes | No |
| Avoided eating outside of the home.                                             | Yes | No |
| Covered your cough or sneeze with a tissue, then throw the tissue in the trash. | Yes | No |
| Avoided close contact with people who are sick.                                 | Yes | No |
| Took a supplement.                                                              | Yes | No |
| Wore a face mask                                                                |     |    |
| Ate a balanced diet.                                                            | Yes | No |

Thank you for participating in this survey.
